# Supplementary material for: Age-Related Changes in Ocular Blood Velocity in Suspects with Glaucomatous Optic Disc Appearance. Comparison with Healthy Subjects and Glaucoma Patients
Source: PLoS One. 2015 Jul 28;10(7):e0134357. doi: 10.1371/journal.pone.0134357 (PMC4517907; doi:10.1371/journal.pone.0134357)
Supplement: S1 Table — (XLSX) [file pone.0134357.s001.xlsx]

## Sheet: CG
AGE	PSV	EDV	RI	PI	MV	ESA	S	D	S/D
63	7.13691	0.890138	0.987528	1.91791	3.67478	29.6308	2.77621	1.11794	2.80869
63	11.4815	1.67839	0.853818	1.61014	6.08837	39.4883	4.13639	2.01974	2.04541
59	11.0486	2.86782	0.740435	1.27281	6.42734	33.3368	3.8256	1.61595	2.44962
59	10.8152	2.86782	0.734835	1.19195	6.66756	33.3114	4.14353	1.41887	3.19138
59	11.5076	4.89504	0.574626	0.849176	7.78705	31.9842	5.35286	1.52555	3.54097
59	11.5076	4.89504	0.574626	0.849176	7.78705	31.9842	5.35286	1.52555	3.54097
51	11.0156	5.39573	0.510172	0.717952	7.82759	27.8497	3.19858	2.03184	1.67807
51	11.8266	4.20638	0.64433	0.887242	8.5887	25.1409	3.23901	2.27234	1.42779
51	10.4832	4.29951	0.589868	0.755219	8.188	25.2002	2.7697	2.27565	1.22449
51	10.5319	4.49235	0.573452	0.7812	7.73109	14.7005	3.36462	0.352709	10.7226
51	9.56677	3.81042	0.601703	0.801125	7.18533	24.8332	2.591	0.646113	5.16121
51	10.948	5.17459	0.527349	0.762408	7.57261	27.8497	3.19858	2.03184	1.67807
51	11.063	5.06379	0.542277	0.806615	7.43751	28.251	3.19197	2.13109	1.51342
51	11.07	5.67654	0.487213	0.652351	8.2677	28.3374	3.31465	2.65144	1.25472
51	16.4803	6.44311	0.609041	0.978191	10.2609	36.6312	4.35614	2.30086	1.89326
51	11.1162	5.67654	0.489346	0.673815	8.07296	27.4098	3.34128	2.57354	1.29896
51	9.56677	3.81042	0.601703	0.801125	7.18533	24.8332	2.591	0.646113	5.16121
59	13.7134	4.99106	0.636046	0.978428	8.91469	29.8009	5.66504	2.45125	2.51552
59	13.7741	4.85535	0.647501	1.05372	8.46403	33.2376	5.60545	1.85944	3.13748
59	11.7197	4.33277	0.6303	1.03323	7.14931	24.7003	4.86645	1.51578	2.82971
59	12.6345	4.31092	0.658797	1.11217	7.48406	26.162	4.90086	1.93496	2.54866
44	10.1707	3.87411	0.619091	1.00869	6.24238	25.6745	4.42935	1.27386	10.7122
44	10.3481	3.7898	0.633768	1.0205	6.42654	32.1762	4.54255	1.52785	10.9753
44	10.9245	4.2691	0.609217	0.891939	7.46172	27.2778	4.04367	3.11741	1.34702
44	10.9523	4.26426	0.610651	0.873065	7.6604	28.561	4.19995	2.79471	1.50282
63	9.96343	5.00694	0.497468	0.724056	6.84545	24.609	3.10086	1.24065	3.49776
63	9.81686	4.93607	0.497185	0.695356	7.01913	28.5893	2.88265	1.39209	2.99005
63	9.67916	4.2717	0.55867	0.800552	6.75466	25.8978	3.63806	2.54894	1.48172
63	9.18442	4.97777	0.45802	0.601404	6.99471	17.427	4.2852	2.54801	1.50226
60	12.0902	4.45559	0.631471	1.09327	6.98325	32.8213	3.90658	2.36493	1.65471
60	12.0598	4.62376	0.616598	1.02754	7.23676	40.8006	3.97785	2.71736	1.55752
60	10.0841	3.50834	0.65209	1.01245	6.49483	29.5457	2.65905	1.18701	2.24013
60	10.0841	3.50834	0.65209	1.01245	6.49483	29.5457	2.65905	1.18701	2.24013
60	10.1001	4.6245	0.542134	0.796361	6.87579	28.2316	2.58868	0.774247	4.63887
60	9.72514	3.65013	0.62467	0.96915	6.26839	28.2386	3.26648	2.34704	1.39441
42	11.8656	6.11093	0.484988	0.685406	8.396	20.6003	5.67041	3.33198	2.11095
42	12.1793	6.24982	0.486849	0.680755	8.71015	27.7929	5.70261	3.81855	2.0225
42	12.5256	5.99098	0.521701	0.730359	8.94713	25.6155	5.52198	3.17535	1.73902
42	11.7536	6.09673	0.481287	0.591647	9.56118	23.1742	3.41223	2.25598	1.51253
61	8.78023	0.894176	0.89816	1.71294	4.6038	32.7141	2.37746	2.26184	1.01596
61	8.70399	0.844309	0.902998	1.65316	4.75435	32.8355	2.55868	2.2581	0.972492
61	9.19773	2.23362	0.757156	1.3067	5.32954	36.4984	2.43792	2.96422	0.822449
61	9.22457	2.39885	0.73995	1.30881	5.2152	32.804	2.43969	2.96358	0.823223
61	9.19773	2.23362	0.757156	1.3067	5.32954	36.4984	2.43792	2.96422	0.822449
59	11.5871	4.61514	0.601699	0.910365	7.6584	21.6632	4.88041	1.90149	3.05096
59	11.4412	4.87078	0.574277	0.83051	7.9113	28.844	3.22478	2.99715	1.60305
59	13.3908	5.64255	0.578625	0.849647	9.11938	34.3777	4.55828	3.22567	1.46429
59	13.2363	5.86994	0.556527	0.783172	9.40579	33.163	5.32647	3.2174	1.65552
50	11.2328	5.13943	0.542461	0.762139	7.99504	25.6952	3.3107	2.83433	1.27585
50	13.0731	5.51943	0.577803	0.906696	8.33101	23.4473	3.72378	2.83433	1.23713
50	11.5903	5.52065	0.523682	0.751215	8.07973	27.7489	3.94375	3.03227	1.30059
50	11.7201	5.74674	0.509669	0.726542	8.22166	27.7206	3.9412	3.26259	1.208
59	15.3159	6.21807	0.594012	0.913077	9.96392	38.1102	5.79953	3.20761	1.85592
59	14.6739	6.71863	0.542138	0.774719	10.2686	25.0993	6.58011	2.52887	2.64797
59	14.3308	6.57094	0.541481	0.786805	9.86247	30.3659	5.69418	2.63689	2.1855
59	15.3159	6.21807	0.594012	0.913077	9.96392	38.1102	5.79953	3.20761	1.85592
59	14.6971	6.13315	0.582697	0.895607	9.56217	33.0984	5.63901	2.94804	2.17274
49	14.8072	7.34284	0.504103	0.700306	10.6587	35.6898	4.22941	3.28788	1.28743
49	14.8072	7.35924	0.502996	0.68504	10.8723	35.6898	4.22941	3.30863	1.27893
49	15.0149	7.82027	0.479164	0.65731	10.9455	31.9518	4.48878	3.36437	1.33804
49	14.8979	7.82027	0.475077	0.631149	11.2139	34.8231	4.58574	3.12018	1.50434
51	10.7614	4.32241	0.598342	0.912355	7.05758	29.963	3.70367	2.07663	1.72574
51	10.7447	4.32621	0.597364	0.886377	7.24128	29.9292	3.95745	2.03949	1.89726
51	10.5961	4.36582	0.58798	0.87561	7.11541	29.5046	3.88066	2.6024	1.49935
51	10.5904	4.35419	0.588854	0.859239	7.25779	29.7899	3.81756	2.49421	1.5808
51	9.87437	2.56392	0.740346	1.18617	6.16307	29.3955	3.24118	1.48359	2.13619
51	10.0998	3.01028	0.701945	1.11539	6.35606	27.2517	3.4413	1.4751	2.13376
51	10.8546	4.3124	0.602712	0.908419	7.20174	26.7273	3.87433	1.36938	2.7932
51	10.9749	4.48527	0.591317	0.875025	7.41655	26.7159	4.04647	1.43852	2.80421
42	10.8158	3.51793	0.674743	1.03223	7.07006	36.4426	2.72769	1.28728	2.11896
42	10.8387	4.37424	0.596425	0.885607	7.29952	29.0935	3.1592	1.29646	2.29852
62	13.7867	2.43766	0.823187	1.6901	6.71498	44.8043	4.99154	2.42452	2.47739
62	13.5638	2.5866	0.809301	1.59535	6.88076	39.0129	5.23738	2.68562	2.23654
62	13.5638	2.5866	0.809301	1.59535	6.88076	39.0129	5.23738	2.68562	2.23654
62	18.8381	4.30655	0.771391	1.57354	9.23491	54.0659	7.29986	3.12078	2.34867
62	18.794	4.36038	0.76799	1.52887	9.44069	53.7719	7.72093	3.09945	2.51717
68	11.3701	2.81839	0.752123	1.39773	6.11832	36.9829	4.83049	1.38451	4.26356
68	11.2235	2.69672	0.759725	1.33987	6.36385	26.5408	4.62669	2.33324	2.62204
68	11.4298	3.15056	0.724357	1.30902	6.32482	41.4052	3.8267	2.97806	1.28423
68	12.0151	3.13775	0.738848	1.31502	6.75069	41.2448	5.04243	2.26115	2.71827
70	11.4108	1.4264	0.874996	1.727	5.78139	37.2315	4.21593	1.17501	3.58801
70	11.4583	1.47746	0.871057	1.67672	5.95257	39.4225	4.41783	1.43793	3.18239
70	13.7013	2.96922	0.78329	1.46559	7.32273	42.7974	4.83752	1.89001	2.55952
70	13.6497	2.934	0.78505	1.42287	7.53107	44.446	4.79343	1.92552	2.55967
70	15.8095	6.08136	0.615336	0.887019	10.9673	34.5568	6.66474	3.69439	2.24482
70	13.412	6.59542	0.508245	0.684686	9.95579	35.2655	4.2138	3.99042	1.05598
65	12.1791	4.71413	0.612934	0.945818	7.89263	32.5341	5.01019	3.34194	1.49572
65	12.1791	4.71413	0.612934	0.945818	7.89263	32.5341	5.01019	3.34194	1.49572
65	12.0893	4.92626	0.59251	0.87522	8.18425	35.2553	5.18193	3.50163	1.44313
64	12.7638	5.31097	0.583903	0.865936	8.60666	23.9764	4.80859	2.90827	2.1975
64	11.6613	4.96111	0.574565	0.86177	7.77486	22.926	5.74538	2.3982	2.22146
64	11.6613	4.92066	0.578033	0.812638	8.2947	27.3445	5.16295	2.39249	1.72289
64	11.1255	5.24693	0.528386	0.760318	7.73167	32.8051	3.05623	0.531863	5.26064
67	10.477	4.22883	0.596368	0.872669	7.15979	34.0682	1.66971	0.951219	1.62238
67	11.4752	4.98789	0.565334	0.774756	8.37337	34.6662	2.60314	0.31223	15.2386
76	20.1832	6.59053	0.673465	1.12866	12.0432	45.8386	7.88566	1.9405	4.06372
76	19.9461	6.90954	0.65359	1.07098	12.1725	47.1491	7.67912	2.75824	2.89241
76	12.5016	4.40144	0.64793	1.03425	7.83194	29.7802	5.12731	1.84389	2.7807
76	12.818	4.32681	0.662443	1.04475	8.12748	33.6065	5.40248	2.04959	2.63588
77	9.80389	3.996	0.592407	0.908178	6.39511	23.0162	3.51771	0.896615	3.92332
77	9.76657	4.33496	0.556143	0.829304	6.5496	23.2219	3.5381	0.80752	4.38144
77	8.85126	3.64442	0.58826	0.909683	5.7238	22.7104	2.93978	0.686684	4.00422
77	9.80389	3.996	0.592407	0.908178	6.39511	23.0162	3.51771	0.896615	3.92332
65	15.1731	3.14717	0.792582	1.14929	10.4638	41.5468	4.22877	2.58246	1.6375
65	14.1376	4.72684	0.665655	0.944178	9.96717	30.5189	3.96164	2.63235	1.20032
65	21.6624	8.28524	0.61753	0.88812	15.0624	55.3762	4.71464	2.8022	2.84989
65	20.2298	6.28701	0.68922	1.17242	11.8923	37.3701	8.35047	7.78315	1.77193
70	12.4541	4.03156	0.676285	1.14098	7.38181	33.8383	4.58098	2.81402	1.62791
70	12.2705	4.02176	0.672241	1.05881	7.79058	34.4262	5.16152	2.73306	1.79044
70	11.0483	3.78765	0.657173	1.10395	6.57696	27.0511	4.65302	1.29441	3.55006
70	10.3798	3.9049	0.623796	0.942972	6.86644	25.8823	3.61671	1.13327	3.19139
74	11.7893	2.81948	0.760844	1.31616	6.81515	36.7097	4.14976	3.01093	1.36997
74	13.6969	3.82233	0.720935	1.32106	7.47475	37.2226	5.3313	3.17869	1.67524
74	9.98162	2.00109	0.799523	1.39066	5.73867	42.8249	2.22248	0.43253	5.75376
74	10.5069	3.33635	0.68246	1.13556	6.31452	35.0728	2.42272	0.370816	7.12097
79	10.104	2.81575	0.721324	0.789641	9.22985	24.5205	1.64916	0.872953	1.94131
79	12.1676	6.10659	0.498126	0.660059	9.18249	15.4345	2.32577	1.55176	3.05473
79	21.1058	13.2711	0.371211	0.416463	18.8125	24.7278	14.6088	1.93401	7.55364
79	21.7765	7.45983	0.657437	0.921166	15.5419	49.8674	5.82256	1.66217	2.79761
79	17.0644	4.23625	0.751749	1.342	9.55895	12.9041	4.99123	1.40801	3.17634
79	21.7765	7.45983	0.657437	0.921166	15.5419	49.8674	5.82256	1.66217	2.79761
74	16.1664	3.71557	0.770167	1.31304	9.48242	57.4743	4.56777	1.32819	3.71273
74	20.1096	5.33323	0.734792	1.34484	10.9875	66.4356	5.63204	1.18676	4.98767
65	11.4524	1.47487	0.871217	1.53028	6.52004	29.6003	4.95373	3.33499	1.48726
65	10.1998	2.55594	0.749412	1.13771	6.71862	32.0718	4.86723	2.4553	2.13477
65	14.6311	5.24595	0.641453	1.06799	8.78772	31.6756	6.36678	4.08601	1.60817
65	14.9304	5.16131	0.654308	1.0669	9.15651	33.1355	7.26668	3.89836	1.92636
65	9.45165	3.82023	0.595814	0.851836	6.61092	25.3068	4.58467	0.935612	4.90018
65	11.2615	5.00552	0.55552	0.763361	8.19533	27.0669	4.64081	1.83613	2.77257
65	11.426	5.03135	0.559657	0.781352	8.18405	27.7552	3.65372	2.46573	1.7332
71	8.92301	0.733789	0.917764	1.72962	4.7347	32.7837	3.34303	1.99028	1.53614
71	8.78138	0.935336	0.893486	1.61707	4.85202	28.2821	3.43821	1.89967	1.71197
71	12.0319	4.14502	0.655499	1.06988	7.37177	27.1674	3.80171	1.98774	1.97527
71	11.9606	4.11299	0.656122	1.01966	7.69629	22.5031	4.27379	2.03259	2.11003
66	10.3316	3.31488	0.679152	1.07372	6.535	34.8238	4.44523	3.01231	1.48835
66	10.2183	3.30634	0.676428	1.03754	6.66181	32.8413	4.2725	3.33794	1.28427
66	10.2899	3.48644	0.661179	1.00529	6.76768	24.1345	5.10451	2.79206	1.83217
66	10.0979	0.996899	0.901277	1.77488	5.12767	34.3836	4.10238	1.92267	2.13538
66	10.2372	1.02311	0.90006	1.73074	5.32378	34.7614	4.18681	1.98586	2.1589

## Sheet: GODA
AGE	PSV	EDV	RI	PI	MV	ESA	S	D	S/D		group
55	11.6867	6.32812	0.458518	0.647462	8.27624	23.625	2.8136	2.43117	2.94739		CG	1
55	12.1957	4.95165	0.593983	0.862025	8.4035	35.3291	4.06134	4.23928	1.31536		GODA	2
55	11.7191	5.60918	0.521365	0.699025	8.74063	33.1903	2.82957	3.02391	1.4845		POAG	3
63	9.54573	4.38725	0.540397	0.752697	6.85333	26.3859	2.66394	0.510367	5.1944
63	11.4928	5.506	0.520918	0.729072	8.21155	27.8532	3.222	0.966262	3.42952
62	11.0657	4.88974	0.558116	0.822248	7.51104	29.9383	4.50974	2.36531	1.91549
62	11.6879	4.6081	0.605736	0.843789	8.39044	31.117	4.27855	2.62975	2.00557
62	10.6624	3.47249	0.674324	1.11705	6.43655	30.0887	3.72825	1.98438	1.89589
62	11.2947	4.01419	0.644595	1.02804	7.08195	31.153	3.96723	1.76106	2.25275
41	10.3718	3.77333	0.636194	0.984663	6.70127	31.856	2.91167	3.07386	0.970738
41	10.3718	3.91742	0.622302	0.920968	7.00829	30.0005	3.25898	3.06984	1.02323
41	10.1132	4.18958	0.585733	0.883423	6.70534	29.9911	2.72884	2.77112	1.015
41	10.2364	4.19288	0.590397	0.863797	6.9965	30.2121	3.00052	3.07034	0.977261
48	12.4178	5.50987	0.556292	0.790811	8.73522	33.0082	3.80373	1.82126	2.02863
48	11.5024	5.18425	0.549288	0.779871	8.10148	31.5356	3.57326	2.28901	1.50393
61	9.15469	3.06606	0.665083	1.04125	5.84742	32.3615	2.24835	0.278857	8.9862
61	9.25327	0.903054	0.902407	1.71187	4.87783	42.0175	2.30901	0.478445	5.08651
60	11.6646	0.452803	0.961181	1.9384	5.78403	43.6989	3.90303	0.634746	6.32442
60	11.5624	0.924608	0.920033	1.76184	6.03788	43.3113	3.93693	0.883057	4.6325
60	11.8754	3.44726	0.709714	1.20499	6.99431	34.673	3.99405	1.33209	2.98602
60	11.6953	3.2795	0.719587	1.18358	7.11043	36.3749	4.13015	1.32017	3.12551
51	13.7401	5.79838	0.577997	0.884935	8.97439	35.0584	4.27287	1.87661	2.22313
51	13.9845	5.66126	0.595177	0.888372	9.36912	34.7362	4.49267	1.87661	2.22313
51	13.9597	6.09382	0.563469	0.881004	8.92827	39.2216	3.85263	2.28465	1.69203
51	15.1967	5.98101	0.606427	0.996898	9.24437	39.2259	4.62751	2.25545	2.48886
51	14.961	5.47339	0.634156	0.968121	9.80003	45.7305	4.27759	1.97796	2.15975
51	17.1847	6.86604	0.600456	0.921538	11.1972	46.5631	5.49973	2.28435	2.46615
51	17.0564	7.10374	0.583515	0.871618	11.4186	46.6405	5.75783	2.19582	2.53405
45	9.23541	5.05487	0.452664	0.608999	6.86461	17.3813	2.92695	2.64891	1.10496
45	9.49675	5.24047	0.448182	0.591535	7.19531	17.3813	3.73947	2.38552	1.65408
46	9.75058	5.4438	0.441695	0.580546	7.41851	23.0831	1.64424	1.0748	1.67613
46	9.25254	5.34129	0.422722	0.558133	7.00773	24.0918	1.94723	0.414724	4.76735
62	10.1829	4.86044	0.522687	0.738563	7.20653	24.3262	4.08445	1.24467	3.28154
62	10.1829	5.01472	0.507536	0.692947	7.45829	22.3768	4.24347	1.19016	3.67459
62	12.3753	5.7542	0.535025	0.750786	8.81887	25.0991	4.72456	1.86099	2.58906
62	12.3697	5.7542	0.534816	0.720969	9.17589	24.2145	5.36355	1.7671	3.05055
73	10.1806	2.02761	0.800835	1.4862	5.48577	32.3395	3.47238	1.32951	2.7026
73	9.96065	1.81529	0.817754	1.45542	5.59659	28.4618	3.41719	1.32624	2.94485
73	12.7109	3.90328	0.69292	1.20932	7.28313	39.6859	3.32497	2.82054	1.17801
73	12.6927	3.83654	0.697737	1.1604	7.63197	40.52	4.23634	2.70484	1.56621
73	10.708	3.03478	0.716587	1.19298	6.43194	41.7065	2.47772	0.652355	3.56865
73	10.708	3.03478	0.716587	1.19298	6.43194	41.7065	2.47772	0.652355	3.56865
73	11.2495	3.35024	0.702188	1.14442	6.90239	36.9414	2.5978	0.635193	3.93164
74	16.4641	4.17268	0.746559	1.33466	9.20945	40.6349	6.047	2.38164	2.39419
74	16.6868	4.25535	0.744988	1.29008	9.6362	42.3108	6.02073	1.95867	2.46657
74	17.0702	4.78125	0.719906	1.29958	9.45608	45.2089	6.19107	2.28845	2.70344
74	17.0067	4.76395	0.719878	1.25224	9.77666	46.7206	6.44752	2.11225	2.99532
65	10.6161	3.39107	0.680571	1.0262	7.04051	34.2435	2.54491	2.3408	1.40362
65	11.647	4.64868	0.600868	0.863631	8.10332	28.5144	5.67108	2.33346	2.95
65	15.4408	6.12832	0.603109	0.93563	9.95317	40.7875	5.5855	4.12128	1.3562
78	8.87115	2.45563	0.723189	1.14237	5.61599	35.9237	1.67605	0.212115	7.90159
78	9.54347	2.47261	0.740911	1.25871	5.61756	34.3885	1.51344	0.203411	6.46921
72	21.1108	15.5657	0.262666	0.301875	18.3688	24.1361	7.8733	10.0766	0.762629
72	21.1164	15.6677	0.258034	0.294194	18.521	24.1955	13.1788	4.04483	3.56554
73	7.65246	1.84738	1.03881	2.05346	3.87124	37.1119	1.65483	0.13391	17.6614
73	10.4479	1.94373	0.81396	1.43479	5.92715	48.8106	2.44027	0.862338	2.9597
68	10.2581	4.83766	0.528407	0.713313	7.59901	29.2097	2.4765	0.564409	4.33361
68	9.1573	3.90598	0.573457	0.82323	6.37891	27.9323	2.06924	0.687447	3.01004

## Sheet: POAG
AGE	PSV	EDV	RI	PI	MV	ESA	S	D	S/D
61	12.8845	5.16191	0.59937	0.892377	8.65394	30.3432	4.96199	1.69585	2.99433
61	13.1094	5.1319	0.608534	0.932607	8.55402	34.4001	4.4375	1.72016	2.62638
61	13.1773	5.04679	0.617009	0.924837	8.79132	36.1291	4.62736	1.65331	2.95219
41	15.0964	4.81974	0.680736	1.22241	8.4069	35.4514	6.55023	2.87	2.28231
41	16.0044	5.07965	0.682609	1.2609	8.66421	41.8442	6.43609	4.04266	1.59204
41	18.3316	5.06901	0.723482	1.33617	9.92584	41.8194	6.3552	4.67949	1.36098
41	18.2671	5.67276	0.689455	1.23944	10.1614	40.242	7.34309	4.16058	1.8466
41	16.7676	5.06336	0.698028	1.24191	9.42438	39.4266	6.80835	3.9634	1.73207
41	16.7255	4.99958	0.70108	1.24777	9.39747	39.5886	6.81711	3.92765	1.74733
41	16.8422	5.24989	0.688289	1.16695	9.93382	39.7694	7.92978	3.7899	2.09449
41	16.9952	4.95332	0.708545	1.22354	9.84177	40.4126	6.8832	3.3433	2.05881
61	8.79603	2.63497	0.700436	1.18763	5.18771	29.0899	2.73435	1.71716	1.57448
61	8.68769	2.66067	0.693742	1.12755	5.34525	25.867	2.53933	1.62724	1.53528
61	9.48242	3.27155	0.654988	1.06591	5.8268	25.8074	3.03768	2.04603	1.57361
61	9.63539	3.31879	0.655562	1.05515	5.98643	25.7674	2.98276	2.11207	1.41472
63	12.2619	3.1746	0.7411	1.32126	6.87773	38.003	4.57315	2.8637	1.60933
63	12.2619	3.1746	0.7411	1.32126	6.87773	38.003	4.57315	2.8637	1.60933
63	11.77	3.31465	0.718382	1.27338	6.64006	35.8614	4.23099	2.5225	1.6773
60	10.1728	4.99391	0.509091	0.711101	7.2829	23.183	4.59765	1.91927	2.23511
60	9.53388	3.9281	0.587985	0.878345	6.3822	23.9709	3.50509	2.01158	1.87831
60	9.50901	4.15445	0.563104	0.801893	6.67741	22.367	3.45179	1.07543	2.0999
60	10.1728	4.99164	0.509315	0.711582	7.28118	23.3146	4.60703	1.69192	2.24035
60	10.1034	4.84723	0.52024	0.700073	7.50809	21.695	4.91785	1.59048	3.09206
44	9.43618	3.47554	0.631679	1.01026	5.90009	27.476	2.51144	2.88225	0.871499
44	9.6251	3.42689	0.643963	1.01506	6.10623	28.5523	2.58931	2.77931	0.937851
44	11.5195	5.18715	0.549707	0.815003	7.76973	31.2405	4.16124	3.01948	1.38038
53	10.6262	4.52743	0.573938	0.824717	7.39503	25.1303	4.73134	2.42085	1.95441
53	9.81136	3.85494	0.607094	0.897087	6.63973	30.194	4.14648	2.46031	1.68532
60	10.6589	5.05593	0.52566	0.738999	7.58182	22.6398	3.66456	2.58398	1.44709
60	10.9737	5.23583	0.522874	0.724761	7.91691	22.5485	3.90454	2.62173	1.37723
60	9.28861	4.71459	0.492433	0.688784	6.64071	18.3738	3.70805	1.95107	1.92988
60	9.94258	4.69063	0.528229	0.75755	6.93282	20.6047	3.85434	1.921	2.21353
41	12.967	5.62196	0.56644	0.762489	9.63294	32.2063	4.70994	3.18607	1.539
41	13.0981	5.33883	0.592398	0.830796	9.33959	31.7494	5.05878	2.35246	2.13211
55	13.1385	5.56533	0.576412	0.874076	8.66425	42.5629	3.76804	3.71112	1.05042
55	9.48999	3.80603	0.598942	0.886085	6.41468	26.4814	2.74342	2.36735	1.23862
62	9.6551	3.33477	0.65461	0.9608	6.57819	25.6661	3.90223	1.62503	2.40133
62	13.6894	5.86521	0.57155	0.827951	9.45005	34.3897	5.58627	2.13651	2.70095
63	13.7643	7.47036	0.457266	0.636547	9.88765	20.9518	5.91666	2.27583	2.59978
63	10.0912	4.15524	0.588232	0.930293	6.38074	14.6595	4.23401	1.11821	4.61396
55	12.0794	3.23927	0.731834	1.23737	7.14429	33.1584	5.10676	2.83547	1.75897
55	12.0794	3.22827	0.732745	1.16087	7.62455	36.2921	5.74563	2.83259	2.1389
55	9.72434	1.61327	0.834099	1.44961	5.59533	26.6566	3.03036	0.394136	7.68862
55	8.93271		1.01318	2.02034	4.47966	30.8299	3.522	1.32046	2.39928
55	10.5582	1.49316	0.858578	1.54695	5.85993	30.5366	3.29572	1.50161	1.22003
55	10.4679	2.05761	0.803435	1.33928	6.27967	30.9779	3.9434	1.36177	1.62778
55	12.7015	4.26829	0.663953	1.19416	7.062	29.2007	4.8175	2.63535	1.78611
55	12.9192	4.15329	0.678518	1.17447	7.46374	28.9374	5.31441	2.6621	1.78392
51	9.03616	2.63956	0.707889	1.20325	5.31612	21.3697	4.97653	1.89583	2.62498
51	10.2145	2.99686	0.706607	1.29945	5.55436	19.506	4.03893	3.2069	1.25945
51	10.1946	3.69325	0.637724	1.07282	6.06005	28.7566	4.37056	2.59821	2.0549
51	10.0415	4.23081	0.57867	0.912306	6.36928	17.8898	3.63371	1.767	3.05308
52	11.7852	5.0892	0.568169	0.842508	7.94765	24.2309	3.53374	2.21825	1.86463
52	11.7653	4.99759	0.575227	0.826632	8.1871	24.3161	3.80576	2.19431	2.22978
52	15.3626	6.63278	0.568252	0.859939	10.1517	32.0582	5.99546	2.91923	2.05379
52	15.824	6.5848	0.583872	0.892078	10.3569	32.0826	6.14489	2.85486	2.13665
56	11.3355	2.77282	0.755387	1.25898	6.80131	32.806	4.21523	4.04407	1.0467
56	11.3109	3.78097	0.665723	1.04652	7.19517	29.5861	5.86356	2.80018	2.6841
56	9.12045	2.50397	0.725456	1.17315	5.63993	26.423	3.45772	3.06975	1.13713
56	9.06841	2.92577	0.677366	1.04399	5.88379	30.2543	3.69731	3.27121	1.14615
55	11.8963	4.03329	0.660963	1.14001	6.89733	33.1308	4.7138	3.60479	1.30765
55	11.8957	4.66092	0.608184	1.01448	7.13152	24.7328	4.99309	3.17313	1.57355
61	9.49454	2.18483	0.769886	1.36766	5.34469	30.6233	3.31676	1.7209	1.96521
61	9.52773	1.63107	0.828808	1.4447	5.46594	27.4457	3.15696	1.85288	1.80759
61	10.024	3.0659	0.694143	1.15523	6.02312	29.0911	3.2385	2.19468	1.47561
61	10.2358	2.16706	0.788285	1.45494	5.54572	31.391	3.14181	1.51076	1.92528
61	9.92731	2.21726	0.77665	1.35175	5.70375	33.1269	2.94758	1.28839	2.00885
60	14.1791	4.52555	0.680829	1.11416	8.66442	41.1177	4.83411	3.27969	1.50166
60	14.0657	4.62571	0.671136	1.0561	8.93855	39.9513	4.83197	3.26466	1.78963
60	14.6629	4.6716	0.681399	1.1716	8.52791	43.1659	4.96167	3.02786	1.61443
60	14.6629	4.6716	0.681399	1.1716	8.52791	43.1659	4.96167	3.02786	1.61443
60	14.6354	4.8974	0.665373	1.10656	8.8003	42.1992	4.95019	2.90578	1.67575
61	15.0075	4.59022	0.694138	1.15761	8.99898	46.2277	5.05763	2.00936	2.56049
61	13.5226	4.41142	0.673774	1.10335	8.25773	28.5747	5.27493	2.91027	1.81164
61	13.4568	4.39111	0.673689	1.04733	8.65602	29.6303	5.39167	3.06192	1.69606
44	9.73072	4.2573	0.562489	0.780813	7.0099	39.6857	3.16436	2.45421	1.97146
44	11.3537	5.14656	0.546705	0.859429	7.22235	29.6038	2.95984	1.7561	3.29667
44	9.81215	4.66143	0.524932	0.739044	6.96943	22.2491	4.06113	2.84184	1.60425
44	9.80662	4.66143	0.524664	0.718551	7.1605	22.2491	4.54964	2.84184	1.83384
44	11.9226	5.4008	0.547013	0.790256	8.25283	28.6938	4.23686	2.95791	1.4809
44	11.9574	5.39301	0.54898	0.775434	8.46539	28.6203	4.16849	2.85405	1.46055
41	9.64341	4.52809	0.530447	0.738294	6.92857	30.087	3.34799	0.497344	3.87831
41	10.1273	4.89922	0.516235	0.731235	7.14962	33.8649	3.3096	0.497344	3.87831
41	11.3419	3.85766	0.659874	1.05385	7.10176	34.2093	3.57222	2.01237	1.77412
41	11.2956	3.85766	0.658482	1.01927	7.29738	34.8405	3.52915	1.99935	1.76466
41	10.8319	4.22808	0.609663	0.89301	7.39497	28.1998	3.2676	1.98011	1.65021
41	11.4831	4.21843	0.632641	0.942804	7.70541	29.6479	3.58534	1.93268	1.93501
41	10.1719	3.3582	0.669854	1.04905	6.49509	33.1512	3.25277	1.69637	1.9922
41	10.1988	3.56773	0.65018	0.959573	6.9104	31.5091	2.77978	2.06832	1.34398
63	9.43628	1.26959	0.865456	1.67055	4.88861	34.8818	3.55469	0.295905	8.08434
63	9.43213	1.28825	0.863419	1.57311	5.17693	34.8089	3.72618	0.328281	7.22197
63	9.82795	2.55518	0.740008	1.32643	5.48297	31.1254	3.63174	2.45868	1.38635
63	10.0913	2.71634	0.730823	1.28888	5.72199	29.7509	3.91733	2.44165	1.60438
58	11.7111	5.0093	0.572262	0.822339	8.14971	27.3777	4.89772	2.94889	1.71354
58	9.17056	3.37588	0.631879	0.910848	6.36185	22.2108	5.02901	1.57569	3.20423
57	11.6055	2.52405	0.782512	1.43408	6.33259	30.6955	4.11982	2.13702	1.92499
57	11.706	2.94392	0.748512	1.33005	6.58778	34.8807	3.72552	1.95973	1.90104
57	11.0016	3.41841	0.68928	1.16363	6.51683	32.4536	3.44906	2.38562	1.49249
57	10.8655	3.62849	0.666054	1.07746	6.71674	33.6765	3.88163	2.27603	1.79732
50	11.5006	4.97005	0.567846	0.827925	7.8879	31.0141	3.90191	2.35077	1.66554
50	10.3344	3.05093	0.704779	1.04355	6.97951	39.681	3.82659	2.40502	1.59108
50	9.11045	3.93463	0.568119	0.833291	6.2113	26.063	2.95295	1.54461	1.78325
50	9.9223	3.76369	0.620684	0.981274	6.27614	28.7405	2.71626	2.2859	1.18716
47	7.7005	3.77194	0.510169	0.658087	5.96966	20.9216	2.4958	1.93981	1.22998
47	10.718	5.50653	0.486236	0.650253	8.01456	25.1718	3.1275	2.97962	1.0422
47	8.36244	4.18643	0.499376	0.657492	6.35142	20.9436	2.61576	2.22581	1.20087
61	12.2511	5.52258	0.549216	0.836584	8.0428	29.3246	5.15752	2.25395	2.28641
61	12.5001	5.63824	0.548944	0.79119	8.67283	26.7897	4.80804	1.9771	2.00532
62	11.786	3.62567	0.692375	1.13527	7.188	30.9682	3.91732	1.49668	2.87276
62	11.786	3.60529	0.694105	1.10481	7.40467	31.6244	4.15389	1.49609	2.87324
62	12.6186	4.90241	0.611495	0.937795	8.22807	42.4113	2.94631	0.860381	3.23622
62	12.8385	4.12733	0.678519	1.17413	7.41923	37.1095	4.14531	2.55701	1.62115
62	12.6116	4.29116	0.659746	1.09304	7.61221	36.9499	3.91357	2.03767	1.87673
52	10.9082	4.73639	0.565796	0.856818	7.20319	26.281	4.05802	2.72896	1.47149
52	10.8342	4.89181	0.548486	0.80068	7.42171	17.967	4.17971	1.06916	1.85626
52	11.8703	5.50898	0.535901	0.78634	8.08972	27.6078	4.60688	2.62374	1.83649
52	12.0094	5.54702	0.538111	0.78068	8.27792	28.0023	5.54033	1.8019	3.29036
69	13.8929	3.8634	0.721915	1.34197	7.47367	34.2614	5.3511	3.17854	1.68933
69	14.0421	3.72983	0.734382	1.31502	7.84192	34.638	6.13166	3.09086	1.98302
69	13.8826	4.01598	0.710718	1.23719	7.97504	34.1615	5.47321	3.70317	1.4794
69	13.8031	4.48217	0.675279	1.13933	8.18106	35.6384	6.19346	3.39639	1.82425
67	11.1426	3.36857	0.697684	1.18995	6.53304	30.1619	4.16348	1.82463	2.28182
67	11.184	3.35217	0.700271	1.14477	6.84137	31.0222	4.28054	2.05372	2.28768
67	11.1426	3.36857	0.697684	1.18995	6.53304	30.1619	4.16348	1.82463	2.28182
67	12.7025	0.559314	0.955968	1.99795	6.07785	48.9945	4.22986	1.56336	2.74056
67	12.7639	0.550153	0.956898	1.84442	6.62202	45.4796	5.15093	1.74225	3.39149
66	11.3809	5.28679	0.53547	0.790459	7.70963	27.4769	4.25879	2.3871	1.78409
66	10.2215	4.14353	0.594626	0.889951	6.82956	21.9168	4.05232	1.83003	2.19937
69	11.8162	3.56374	0.698402	1.06323	7.76165	52.896	3.40094	1.57443	3.05975
69	12.7698	4.19083	0.671818	1.0994	7.80334	39.312	3.8651	3.58694	1.07755
69	12.7698	4.2704	0.665587	1.03876	8.18229	41.2268	4.07321	3.63119	1.03224
69	12.9001	4.39651	0.659188	1.10625	7.68687	39.1324	3.75724	3.22182	1.40371
73	11.4923	4.79598	0.582677	0.869067	7.70512	27.0163	4.54419	1.93046	2.37224
73	11.441	4.86637	0.574656	0.827756	7.94273	28.8526	4.855	1.69612	2.64701
73	10.2325	3.29413	0.678072	1.12029	6.19336	28.225	3.58875	1.22045	2.97037
73	10.2195	3.10991	0.69569	1.10967	6.407	28.1192	3.84537	1.25671	2.87436
66	9.22424	0.598589	0.935107	1.93075	4.46751	30.5271	4.20104	1.16549	6.0314
66	9.2115	1.24659	0.86467	1.63876	4.86031	27.3849	3.34699	1.76457	2.47661
66	10.3138	2.01989	0.804156	1.48731	5.57643	38.3471	3.59572	2.80684	1.28008
66	10.3916	2.01989	0.805623	1.38685	6.03652	38.3471	4.16713	3.06961	1.35274
66	13.2006	3.02009	0.771216	1.48559	6.85286	38.1617	4.63439	3.11952	1.54189
66	12.9186	3.05229	0.763728	1.35428	7.28526	36.5812	5.21642	3.4488	1.51253
73	11.035	0.163975	0.98514	2.73553	3.97401	47.5489	2.30352	0.569021	7.81183
73	11.2902	0.168407	0.985084	2.65308	4.19204	43.9711	2.58828	0.488338	8.91781
73	9.55582	0.925565	0.903141	2.1198	4.07126	39.2792	4.71537
73	9.228	1.7761	0.807532	1.70985	4.35821	32.7161	1.93876	1.15815	1.76213
73	9.228	1.7761	0.807532	1.70985	4.35821	32.7161	1.93876	1.15815	1.76213
74	6.10145	0.285773	0.953163	1.70735	3.40625	11.8004	2.13711	0.407838	5.1205
74	7.23626	0.775424	0.892842	1.51406	4.26722	21.2079	4.14476	0.48759	8.04959
74	5.79049	0.15248	0.973667	2.00634	2.81009	17.256	2.23701	0.282884	10.8038
74	5.85751	0.276653	0.95277	1.67249	3.33685	17.2077	2.31447	1.14901	3.13629
75	13.2602	3.09105	0.766893	1.56623	6.49279	39.9648	4.46094	1.42684	3.12683
75	13.389	3.07597	0.770262	1.5494	6.65619	40.6343	4.65323	1.23484	4.10878
75	15.3181	2.89526	0.810991	1.57724	7.87628	48.0662	5.03646	1.65604	3.06887
75	15.9311	2.93709	0.815638	1.59492	8.14711	48.1395	5.25334	1.71926	3.10077
65	10.7142	4.13218	0.614327	0.945197	6.96364	26.3159	3.95173	2.32424	1.70889
65	10.7998	4.13929	0.616725	0.933767	7.13293	27.7509	4.1642	2.43186	1.71188
65	9.71783	3.09647	0.681362	1.09524	6.04558	27.4291	3.6646	1.98843	1.87735
65	9.72632	3.5784	0.632091	0.984513	6.24463	26.8244	3.59323	2.00062	1.83883
75	13.6905	3.67737	0.731392	1.28562	7.78853	36.8247	4.91426	1.96853	2.49545
75	13.1783	2.889	0.780775	1.38024	7.45471	39.054	4.73064	2.01576	2.41535
64	11.2169	3.7167	0.668651	1.09901	6.82447	32.2665	3.58388	2.45048	1.43846
64	11.2613	3.72269	0.669426	1.05605	7.13851	34.67	4.17966	2.45048	1.67758
64	12.1129	1.4158	0.883116	1.66402	6.42846	45.7258	3.52105	1.8691	1.88382
64	12.0553	1.47561	0.877596	1.60332	6.59857	44.8322	3.64819	1.90436	1.99936
66	16.4702	8.78527	0.466597	0.61775	12.4402	32.3571	4.33685	3.54499	0.858571
66	16.1062	5.58426	0.653284	1.09351	9.6221	44.1475	5.19177	3.04924	1.70264
66	16.0986	5.65555	0.648692	1.02591	10.1792	47.7431	5.43359	4.06438	1.24851
77	11.3789	0.244799	0.978487	2.39367	4.65148	38.8203	3.91498	0.158136	6.25999
77	16.7269	1.73511	0.896269	2.12629	7.05069	51.0488	5.87455	1.82083	3.2263
77	16.7269	1.74254	0.895825	2.02545	7.39806	51.0488	6.65022	1.82083	3.76453
69	13.2864	0.307416	0.976862	2.15934	6.01065	33.0401	3.70807	1.31656	3.05878
69	13.5768	1.75776	0.870532	1.75199	6.74607	40.0043	4.41613	1.89913	2.2879
69	11.3553	1.379	0.878559	1.87232	5.32832	54.0133	2.73167	0.29789	11.978
69	14.0825	0.704343	0.949984	1.96779	6.79855	38.653	4.92657	1.39683	2.95397
69	14.4285	1.31349	0.908965	1.83115	7.16214	52.3393	5.76128	2.03571	2.59936
69	12.6155	0.223701	0.982268	2.03316	6.09484	61.3955	2.62116	0.244407	9.58267
72	19.1806	6.01547	0.686378	1.16654	11.2857	47.3979	7.46407	3.44952	2.25651
72	12.6566	3.51549	0.722239	1.18131	7.73807	25.7222	4.80521	2.77064	1.73451
71	9.8604	0.658601	0.933207	1.89026	4.86801	36.4311	3.64653	0.639362	6.65556
71	10.029	0.580266	0.942141	1.75876	5.37241	32.3221	3.7084	1.49888	5.87799
71	16.2632	3.6797	0.773741	1.39856	8.99753	44.187	5.61162	1.63437	2.8206
71	16.6059	3.6797	0.778411	1.37607	9.39358	41.0884	5.90959	1.68021	2.9073
69	13.1018	3.28934	0.74894	1.20788	8.12375	43.9409	4.62788	1.00391	4.39211
69	12.2938	1.93929	0.842255	1.43297	7.22592	42.5378	4.39703	0.770197	5.72251
77	4.46749	1.23134	0.724378	1.205	2.6856	10.9919	1.53544	0.277435	4.26251
77	5.12852	1.26797	0.752762	1.29686	2.97684	12.8825	1.61705	0.341618	3.9305
77	9.39629		1.04526	2.71989	3.61101	45.7233	1.98726	0.747567	2.45308
77	9.74421		1.02884	2.5962	3.86149	46.8447	2.16709	0.854964	2.08763
73	12.4073	4.40971	0.644588	1.00898	7.92639	33.8853	4.88827	2.226	2.10537
73	13.0484	3.78721	0.709758	1.19665	7.73929	33.1781	4.94383	2.6773	1.85817
71	12.3756	1.808	0.853906	1.55452	6.79796	34.4624	3.97561	1.37116	2.84003
71	12.3463	1.70339	0.862032	1.54291	6.89792	35.9189	3.95711	1.31983	2.9204
71	14.0968	4.14433	0.706009	1.15568	8.61181	37.5172	4.77693	1.77728	2.694
71	14.0696	4.4405	0.684392	1.06714	9.02334	34.2877	5.27395	1.84989	3.12825
65	11.9314	1.14868	0.903726	1.96252	5.49432	24.1481	3.91881	1.68168	2.71964
65	9.66562	0.691438	0.928464	1.6446	5.45677	37.0018	3.68721	0.525083	4.77776
65	12.5043	4.49375	0.640624	0.997746	8.02865	28.1391	5.35817	1.97502	2.64633
71	11.1815	5.37563	0.519239	0.685845	8.46529	21.6965	4.69894	2.35893	1.9912
71	9.64019	3.48987	0.637987	1.02545	5.99767	21.5931	4.28243	2.7614	1.55281
72	10.7037	1.58067	0.852325	1.67512	5.44619	42.5819	3.1537	1.31062	2.3478
72	10.7317	1.7173	0.839979	1.58026	5.70439	40.8945	3.42859	1.31062	2.42328
72	10.5762	0.219654	0.979231	2.08084	4.97707	48.4244	3.16375	0.506321	3.32379
72	10.4779	0.820278	0.921713	1.91034	5.05542	45.0085	3.30379	0.789404	2.82916
79	12.3863	4.43088	0.642275	0.981828	8.10262	28.4949	5.35118	2.48043	2.15736
79	12.3863	4.45897	0.640007	0.942054	8.4149	28.6907	5.84858	2.53753	2.30483
79	15.1719	5.10573	0.663475	1.08043	9.31683	34.7695	6.07584	2.9269	2.07586
76	8.93021		1.02614	2.49276	3.6761	37.0388	2.46126	0.377518	7.05306
76	8.75571		1.02977	2.31494	3.89485	32.2697	2.56891	0.679858	4.21834
76	10.4099	0.199453	0.98084	2.10252	4.8563	41.7337	2.89831	0.325489	5.2277
76	10.2699	0.140037	0.986364	1.94771	5.20089	41.9981	2.8785	0.508133	5.11744
68	11.3404	3.37973	0.701975	1.10623	7.19628	40.28	4.2359	2.23646	2.00073
68	12.9254	4.32139	0.665666	1.10716	7.77124	34.0631	4.89263	2.21266	2.2112
